# Interferon-Beta Induces Distinct Gene Expression Response Patterns in Human Monocytes versus T cells

Noa Henig<sup>1,2,3</sup>, Nili Avidan<sup>3</sup>, Ilana Mandel<sup>1</sup>, Elsebeth Staun-Ram<sup>1,3</sup>, Elizabeta Ginzburg<sup>3</sup>, Tamar Paperna<sup>1,3</sup>, Ron Y. Pinter<sup>2,3</sup>, Ariel Miller<sup>1,3\*</sup>

**1** Division of Neuroimmunology and Multiple Sclerosis Center, Carmel Medical Center, Haifa, Israel, **2** Department of Computer Science, Technion-Israel Institute of Technology, Haifa, Israel, **3** Rappaport Faculty of Medicine & Research Institute, Technion-Israel Institute of Technology, Haifa, Israel

## Abstract

**Background:** Monocytes, which are key players in innate immunity, are outnumbered by neutrophils and lymphocytes among peripheral white blood cells. The cytokine interferon- $\beta$  (IFN- $\beta$ ) is widely used as an immunomodulatory drug for multiple sclerosis and its functional pathways in peripheral blood mononuclear cells (PBMCs) have been previously described. The aim of the present study was to identify novel, cell-specific IFN- $\beta$  functions and pathways in tumor necrosis factor (TNF)- $\alpha$ -activated monocytes that may have been missed in studies using PBMCs.

**Methodology/Principal Findings:** Whole genome gene expression profiles of human monocytes and T cells were compared following *in vitro* priming to TNF- $\alpha$  and overnight exposure to IFN- $\beta$ . Statistical analyses of the gene expression data revealed a cell-type-specific change of 699 transcripts, 667 monocyte-specific transcripts, 21 T cell-specific transcripts and 11 transcripts with either a difference in the response direction or a difference in the magnitude of response. RT-PCR revealed a set of differentially expressed genes (DEGs), exhibiting responses to IFN- $\beta$  that are modulated by TNF- $\alpha$  in monocytes, such as *RIPK2* and *CD83*, but not in T cells or PBMCs. Known IFN- $\beta$  promoter response elements, such as ISRE, were enriched in T cell DEGs but not in monocyte DEGs. The overall directionality of the gene expression regulation by IFN- $\beta$  was different in T cells and monocytes, with up-regulation more prevalent in T cells, and a similar extent of up and down-regulation recorded in monocytes.

**Conclusions:** By focusing on the response of distinct cell types and by evaluating the combined effects of two cytokines with pro and anti-inflammatory activities, we were able to present two new findings. First, new IFN- $\beta$  response pathways and genes, some of which were monocytes specific; second, a cell-specific modulation of the IFN- $\beta$  response transcriptome by TNF- $\alpha$ .

**Citation:** Henig N, Avidan N, Mandel I, Staun-Ram E, Ginzburg E, et al. (2013) Interferon-Beta Induces Distinct Gene Expression Response Patterns in Human Monocytes versus T cells. PLoS ONE 8(4): e62366. doi:10.1371/journal.pone.0062366

**Editor:** Thomas Jens Scriba, University of Cape Town, South Africa

**Received:** July 28, 2012; **Accepted:** March 21, 2013; **Published:** April 23, 2013

**Copyright:** © 2013 Henig et al. This is an open-access article distributed under the terms of the Creative Commons Attribution License, which permits unrestricted use, distribution, and reproduction in any medium, provided the original author and source are credited.

**Funding:** This study was supported by the Wolfson Family Charitable Trust, the Sacta-Rashi Foundation, Galil Center for Medical Informatics, Telemedicine and Personalized Medicine, and the Adelis Foundation. The funders had no role in study design, data collection and analysis, decision to publish, or preparation of the manuscript.

**Competing Interests:** The authors have declared that no competing interests exist.

\* E-mail: millera@tx.technion.ac.il

## Introduction

T cells comprise 25–30% and monocytes constitute 3–10% of all circulating leukocytes in a normal individual [1]. The distinct activities of T cell subsets, monocytes, and monocyte-derived dendritic cells and macrophages are determined in part by the cytokines they secrete into the environment, such as TNF- $\alpha$ , IFN- $\beta$  and others [2–5]. Monocytes are part of the innate immune system, which is the first line of host defense against infections. Activated monocytes can function as antigen-presenting cells and as immune effector cells [6–8]. Aberrations of monocyte function are increasingly recognized as important in different autoimmune diseases, such as systemic lupus erythematosus and multiple sclerosis (MS) [9,10]. As a result, monocytes are becoming an appealing target for therapeutic strategies which are aimed at manipulating monocyte-mediated immune responses [11,12].

Type I interferons (IFNs) are cytokines that are secreted in response to viral and bacterial infections, and are involved in the

elicitation of antiviral, antiproliferative, and immunomodulatory responses [13]. IFN- $\alpha$  and IFN- $\beta$  induce their biological effects by binding to a heterodimeric cell surface receptor complex (IFNAR) which is composed of two distinct transmembrane proteins, namely IFNAR1 and IFNAR2. This interaction activates the Janus-activated kinase (JAK)/signal transducer and activator of transcription (STAT) signaling pathway, and results in the assembly of IFN-stimulated gene factor 3 (ISGF3) complexes and STAT1 homodimers. These complexes then translocate into the cell nucleus where they activate the transcription of many different genes by binding to IFN-stimulated response elements (ISREs) or IFN- $\gamma$ -activating sites (GAS) in their promoters. Ligand binding to IFNAR can also lead to activation of mitogen-activated protein kinase (MAPK) signaling cascades, including the p38 and the phosphatidylinositol 3-kinase cascades [14,15].

Recombinant IFN- $\alpha$  and IFN- $\beta$  have been approved for the treatment of numerous diseases, which include hepatitis B and C,

melanoma, T cell lymphomas, and MS [16]. In fact, IFN- $\beta$  was the first drug to be approved for use in MS patients, and is still one of the most widely used drugs for treating patients with relapsing MS [17]. Since up to 50% of all MS patients do not benefit from IFN- $\beta$  treatment or respond only partially, genetic biomarkers that are predictive of the patient's response to IFN- $\beta$  therapy are of major importance, and are the focus of many studies [17–19]. To this end, some investigators analyzed the whole genome transcription profiles of peripheral blood mononuclear cells (PBMCs), which are a mixture of several leukocyte subsets [20–22]. Other investigators have analyzed the expression of a few selected genes, such as *FOXP3* or *IFNAR2*, in specific cell subsets, such as regulatory T cells [23,24]. None of the studies conducted to date have been successful in identifying clinically relevant genetic biomarkers for response to therapy [25].

The study of Van Boxel-Dezaire et al. highlighted the differential effects of IFN- $\beta$  on apoptosis-related genes in various leukocyte subsets [26]. Specifically, these researchers found that IFN- $\beta$  up-regulated apoptosis-inducing genes in monocytes, but not in T cells, and that this up-regulation was associated with the activation of the STAT1 protein. In a different study, Waddell et al. reported on cell-specific changes in gene expression profiles after IFN- $\gamma$  induction [27]. Together, these studies emphasize the importance of studying gene expression profiles in separated leukocyte populations.

Blood monocytes may encounter IFN- $\beta$  during infections, or when administered as a long-term immunomodulatory therapy in MS. One of the cytokines elevated in these states is the pro-inflammatory TNF- $\alpha$  [28,29]. Only a few *in vitro* studies have considered the effects of TNF- $\alpha$  on the cellular response to IFN- $\beta$ ; however, from these studies it is clear this cross-interaction is complex and cell type-dependent [3]. We hypothesized that IFN- $\beta$  elicits a cell-specific gene expression response in monocytes, which may be modulated by the pro-inflammatory cytokines in the extracellular milieu under conditions of infection or inflammatory disease. Furthermore, we surmised that the cell-specific response of monocytes to cytokines might have been obscured by the response of the more abundant cells in the PBMC population, such as T cells. Accordingly, the aim of the present study was to dissect the transcriptional profile of TNF- $\alpha$ -activated monocytes following exposure to IFN- $\beta$ , using networks and pathways analysis tools.

## Results

### Analysis of Microarray Data Shows Distinct IFN- $\beta$ Gene Expression Response Profiles in Monocytes and T Cells

We compared the gene expression profiles of human TNF- $\alpha$ -activated monocytes and T cells following exposure to IFN- $\beta$ , using Illumina's BeadArray<sup>TM</sup> microarray technology. The pre-activation with TNF- $\alpha$  was done in order to simulate a pro-inflammatory state in the cells at the time of exposure to IFN- $\beta$ . The study workflow is shown in Fig. S1. Analysis of the IFN- $\beta$  effect within each cell type revealed the presence of 2113 and 242 differentially expressed genes (DEGs) ( $\geq$  twofold change at adjusted p-value of 0.05) in monocytes and T cells respectively, with 106 transcripts common to both cell types (Table 1). In addition, following IFN- $\beta$  exposure a cell-type specific change of 699 transcripts was revealed with 667 monocyte-specific transcripts, 21 T cell-specific transcripts (Tables 2 and 3), and 11 transcripts with either a difference in the response direction, for example *RARA*, or a difference in the magnitude of response, for example *CD38*. The T cell IFN- $\beta$  response appeared to involve a smaller number of genes compared to the monocyte response (Fig. 1). Moreover, the overall directionality of the gene expression

regulation by IFN- $\beta$  was different in T cells and monocytes, with up-regulation more prevalent in T cells, and a similar extent of up and down-regulation recorded in monocytes (Figs. 1 and 2). The hierarchical clustering displayed in figure 2 presents the 50 top DEGs in each cell type, ranked according to the highest difference in expression. This figure highlights the small variability in expression levels across the biological replicates within cell type.

### Validation of the Gene Expression Microarray Results by Quantitative Real-time PCR

Seven genes from the monocytes-specific DEG list were selected for further validation by real time (RT)-PCR analysis at the same TNF- $\alpha$  and IFN- $\beta$  exposures used for the gene array experiment. The selection criteria included, in addition to a significant P value for interaction (cell-type\*IFN- $\beta$ ), lack of previous reports at the time of analysis as an IFN- $\beta$  response gene, and functional relevance to monocyte activity. The seven selected genes encode: (a) *CD38*, a multifunctional ectoenzyme that is involved in cell adhesion, signal transduction, and calcium signaling [30]; (b) *CD83*, known as a marker for dendritic cell activation, that is involved in CD4<sup>+</sup> T cell maturation and B cell receptor signaling [4,31,32]; (c) *ASCL2*, a transcription factor [33]; (d) *LTA4H*, a bifunctional zinc metalloenzyme [34]; (e) *RIPK2*, a kinase which has been associated with apoptosis induction and implicated in Nod1 and Nod2 signaling [35,36]; (f) *SIGLEC10*, a sialic acid binding cell surface protein involved in regulation of circulating levels of inflammatory cytokines [37]; and (g) *TBXAS1*, encoding the synthase for thromboxane A, which promotes platelet aggregation and is a potent vasoconstrictor [38]. In addition, *TRIM25/EFP*, which is known to be up-regulated by IFN- $\beta$  [39] and was detected as a DEG in T cells in this study, was used as a positive control for IFN- $\beta$  effect. Analysis of the IFN- $\beta$  response following pre-exposure to TNF- $\alpha$  for these genes was performed in parallel in PBMCs, to assess the cytokine effects in a mixed cell population that include cell-cell interactions and an averaging effect of the combined activities of the different cell types. The change in expression levels following IFN- $\beta$  treatment was significant for all eight genes in the monocytes, T cells, and PBMCs, except for *CD83* and *SIGLEC10* in T cells (Fig. 3). A significant difference in response was observed for all genes between the monocytes and T cells, whereas the PBMC response was intermediate between the levels of transcripts in the monocytes and in the T cells (Fig. 3).

### The TNF- $\alpha$ -activated Monocytes Display an Enhanced Differential Transcriptional Response to IFN- $\beta$ for Selected Genes

In order to evaluate the contribution of TNF- $\alpha$  to the monocytes' overall response to IFN- $\beta$ , we repeated the RT-PCR analysis of the IFN- $\beta$  response in monocytes that had not been pretreated by TNF- $\alpha$  (Fig. 3). Pre-incubation of the monocytes with TNF- $\alpha$  increased the magnitude of the IFN- $\beta$  response for seven of the tested genes. Interestingly, up- or down-regulation of *CD83* expression in monocytes by IFN- $\beta$  depended on whether the monocytes were pre-exposed to TNF- $\alpha$  or not. In contrast, pre-incubation with TNF- $\alpha$  did not affect the IFN- $\beta$  response in T cells and in PBMCs. These results suggest that a prior TNF- $\alpha$  exposure of leukocytes can modulate the IFN- $\beta$  response in a cell-specific manner.

**Table 1.** Differentially expressed genes in both monocytes and T cells (25 out of 106 genes).

| Gene      | DEFINITION                                                         | Monocytes                |                      | T cells                  |                      | Cell-type*IFN-β      |
|-----------|--------------------------------------------------------------------|--------------------------|----------------------|--------------------------|----------------------|----------------------|
|           |                                                                    | Fold change <sup>1</sup> | P-value <sup>2</sup> | Fold change <sup>1</sup> | P-value <sup>2</sup> | P-value <sup>3</sup> |
| LAG3      | Lymphocyte-activation gene 3 (LAG3)                                | 8.66                     | 2e-4                 | 6.91                     | 4e-4                 | 0.48                 |
| TLR7      | Toll-like receptor 7 (TLR7)                                        | 6.92                     | 5e-4                 | 2.85                     | 0.006                | 0.06                 |
| NT5C3     | 5'-nucleotidase, cytosolic III (NT5C3)                             | 10.1                     | 5e-4                 | 7.51                     | 0.001                | 0.47                 |
| SLC38A5   | Solute carrier family 38, member 5 (SLC38A5)                       | 4.89                     | 5e-4                 | 2.4                      | 0.006                | 0.07                 |
| ISG20     | Interferon stimulated exonuclease gene 20kDa (ISG20)               | 15.3                     | 0.001                | 5.3                      | 0.007                | 0.11                 |
| DUSP5     | Dual specificity phosphatase 5 (DUSP5)                             | 10.2                     | 0.001                | 2.63                     | 0.033                | 0.06                 |
| ZBP1      | Z-DNA binding protein 1 (ZBP1)                                     | 9.45                     | 0.001                | 11.9                     | 0.001                | 0.63                 |
| LGALS3BP  | Lectin, galactoside-binding, soluble, 3 binding protein (LGALS3BP) | 9.13                     | 0.001                | 5.1                      | 0.004                | 0.25                 |
| CD14      | CD14 molecule (CD14)                                               | 0.11                     | 0.001                | 0.38                     | 0.034                | 0.06                 |
| GIMAP6    | GTPase, IMAP family member 6 (GIMAP6)                              | 5.32                     | 0.001                | 2.06                     | 0.039                | 0.07                 |
| HS.561105 | BX116726 NCI_CGAP_Pr28 cDNA clone IMAGp998J065569 sequence         | 4.78                     | 0.002                | 2.75                     | 0.011                | 0.18                 |
| JAK2      | Janus kinase 2 (a protein tyrosine kinase) (JAK2)                  | 3.34                     | 0.002                | 2.82                     | 0.004                | 0.57                 |
| HSH2D     | Hematopoietic SH2 domain containing (HSH2D)                        | 7.67                     | 0.002                | 8.21                     | 0.002                | 0.9                  |
| IFITM2    | Interferon induced transmembrane protein 2 (1-8D) (IFITM2)         | 7.8                      | 0.002                | 4.91                     | 0.007                | 0.39                 |
| CBX7      | Chromobox homolog 7 (CBX7)                                         | 0.18                     | 0.002                | 0.46                     | 0.049                | 0.09                 |
| HS.537991 | HUMGS0004661 Human adult (K.Okubo) cDNA 3 sequence                 | 5.47                     | 0.003                | 2.93                     | 0.016                | 0.19                 |
| AIM2      | Absent in melanoma 2 (AIM2)                                        | 13.6                     | 0.003                | 6.67                     | 0.01                 | 0.32                 |
| DYNLT1    | Dynein, light chain, Tctex-type 1 (DYNLT1)                         | 4.01                     | 0.003                | 3.26                     | 0.005                | 0.58                 |
| LOC728216 | PREDICTED: similar to ubiquitin specific peptidase 18 (LOC728216)  | 4.92                     | 0.003                | 3.74                     | 0.006                | 0.52                 |
| SP140     | SP140 nuclear body protein (SP140)                                 | 3.98                     | 0.003                | 3.66                     | 0.004                | 0.83                 |
| ATF3      | Activating transcription factor 3 (ATF3)                           | 4.94                     | 0.003                | 2.17                     | 0.048                | 0.11                 |
| MOV10     | Mov10, Moloney leukemia virus 10, homolog (mouse) (MOV10)          | 3.64                     | 0.003                | 3.67                     | 0.003                | 0.98                 |
| GBP4      | Guanylate binding protein 4 (GBP4)                                 | 9.43                     | 0.003                | 4.28                     | 0.019                | 0.23                 |
| TNFSF10   | Tumor necrosis factor (ligand) superfamily, member 10 (TNFSF10)    | 27.2                     | 0.003                | 10                       | 0.015                | 0.3                  |
| GBP5      | Guanylate binding protein 5 (GBP5)                                 | 8.77                     | 0.003                | 6.13                     | 0.007                | 0.57                 |

<sup>1</sup>Expression level in treated samples divided by expression level in untreated samples.

<sup>2</sup>FDR adjusted p-value for IFN-β effect within each cell type.

<sup>3</sup>FDR adjusted p-value of the two-way ANOVA for the cell-type\*IFN-β interaction.

doi:10.1371/journal.pone.0062366.t001

### IFN-β Increases CD38 Protein Expression in Monocytes but not in T Cells

To determine whether the IFN-β response seen at the RNA level also extends to the encoded protein level, we measured CD38 protein levels by flow cytometry. We did not detect any change in CD38 protein expression in either monocytes or T cells after 16 hours of IFN-β exposure; however, following a longer exposure of 40 hours to IFN-β a significant increase in CD38 expression was observed, and in monocytes only (Fig. 4). Thus, the protein analysis for CD38 in monocytes corroborates the differential cell-specific results obtained at the RNA level.

### Enriched Biological Functions within the IFN-β Response DEGs

Four bioinformatics tools were used to identify enriched biological functions and gain insight on possible functional consequences of the changes in gene expression elicited by IFN-β: (a) GOrilla, a program that identifies enriched Gene Ontology (GO) terms in ranked lists of transcripts [40], (b) SPIKE, a program for detecting enriched signaling pathways, (c) PRIMA, a program for identifying transcription factor binding sites which are enriched in gene promoters [41,42], and (d) Ingenuity Pathway

Analysis (IPA) (Ingenuity® Systems, www.ingenuity.com), a program for detecting known canonical pathways that are enriched with the DEGs and for construction of new networks of interactions between the DEGs.

The complete gene lists, ranked by the p-value and fold change within each cell type, were uploaded into GOrilla. Almost all of the top enriched GO terms that were identified by GOrilla were directly related to immune system activity in both cell types, which is in agreement with the expected effects of IFN-β (Fig. 5A and Table 4). However, despite the large number of IFN-β response DEGs identified in monocytes GOrilla did not identify any novel functional network connecting these DEGs. We deduced that the paucity of functional links between the monocyte DEGs may result from the poor representation of biological interactions data for these genes in the available databases.

The most prominent pathway that was identified in the monocyte DEGs by SPIKE was 'translation elongation' (116-fold enrichment with a p-value of  $10^{-65}$ ). This pathway, which has many ribosomal subunit proteins involved in protein translation, was found to be down-regulated by IFN-β (Fig. 5B). SPIKE did not identify any significantly enriched pathways from the list of T cell DEGs.

**Table 2.** Differentially expressed genes in monocytes but not in T cells (25 out of 667).

| Gene      | DEFINITION                                                                                       | Monocytes                |                      | T-cells                  |                      | Cell-type*IFN-β      |
|-----------|--------------------------------------------------------------------------------------------------|--------------------------|----------------------|--------------------------|----------------------|----------------------|
|           |                                                                                                  | Fold change <sup>1</sup> | P-value <sup>2</sup> | Fold change <sup>1</sup> | P-value <sup>2</sup> | P-value <sup>3</sup> |
| HS.564389 | DKFZp686C15231_r1 686 (synonym: hlcc3)                                                           | 9.95                     | 3.6e-5               | 1.14                     | 0.4                  | 0.003                |
| AXL       | AXL receptor tyrosine kinase (AXL)                                                               | 13.1                     | 3.9e-5               | 1.25                     | 0.22                 | 0.003                |
| STAB1     | stabilin 1 (STAB1)                                                                               | 0.07                     | 3.9e-5               | 1.11                     | 0.6                  | 0.003                |
| TBXAS1    | Thromboxane A synthase 1 (platelet, cytochrome P450, family 5, subfamily A) (TBXAS1)             | 0.03                     | 4e-5                 | 0.84                     | 0.5                  | 0.003                |
| PID1      | Phosphotyrosine interaction domain containing 1 (PID1)                                           | 0.02                     | 5e-5                 | 1.02                     | 0.96                 | 0.003                |
| DEFB1     | Defensin, beta 1 (DEFB1)                                                                         | 31.8                     | 0.0001               | 1.18                     | 0.58                 | 0.004                |
| EDN1      | endothelin 1 (EDN1)                                                                              | 23.2                     | 0.0001               | 1.69                     | 0.06                 | 0.005                |
| SAMD4A    | Sterile alpha motif domain containing 4A (SAMD4A)                                                | 7.84                     | 0.0001               | 1.47                     | 0.04                 | 0.005                |
| CLEC4A    | C-type lectin domain family 4, member A (CLEC4A)                                                 | 0.06                     | 0.0001               | 1.05                     | 0.86                 | 0.004                |
| QSOX1     | Quiescin Q6 sulfhydryl oxidase 1 (QSOX1)                                                         | 0.3                      | 0.0001               | 0.93                     | 0.51                 | 0.005                |
| KIAA1199  | KIAA1199 (KIAA1199)                                                                              | 12.3                     | 0.0001               | 1.18                     | 0.49                 | 0.005                |
| SLC11A1   | Solute carrier family 11 (proton-coupled divalent metal ion transporters), member 1 (SLC11A1)    | 0.04                     | 0.0001               | 1.04                     | 0.92                 | 0.005                |
| OLR1      | Oxidized low density lipoprotein (lectin-like) receptor 1 (OLR1)                                 | 0.16                     | 0.0001               | 1.04                     | 0.84                 | 0.005                |
| CD80      | CD80 molecule (CD80)                                                                             | 26.9                     | 0.0001               | 1.6                      | 0.16                 | 0.008                |
| FOS       | v-fos FBJ murine osteosarcoma viral oncogene homolog (FOS)                                       | 0.06                     | 0.0001               | 1.04                     | 0.92                 | 0.005                |
| LTA4H     | Leukotriene A4 hydrolase (LTA4H)                                                                 | 0.04                     | 0.0001               | 0.74                     | 0.35                 | 0.007                |
| RHBDD2    | Rhomboid domain containing 2 (RHBDD2)                                                            | 0.05                     | 0.0001               | 0.99                     | 0.98                 | 0.005                |
| HTRA1     | HtrA serine peptidase 1 (HTRA1)                                                                  | 0.03                     | 0.0001               | 1.07                     | 0.88                 | 0.005                |
| CXCL9     | Chemokine (C-X-C motif) ligand 9 (CXCL9)                                                         | 24.1                     | 0.0001               | 1.79                     | 0.1                  | 0.01                 |
| C5ORF29   | Chromosome 5 open reading frame 29 (C5orf29)                                                     | 0.08                     | 0.0002               | 0.85                     | 0.58                 | 0.008                |
| SEPT9     | Septin 9 (SEPT9)                                                                                 | 0.18                     | 0.0002               | 0.81                     | 0.27                 | 0.01                 |
| ASCL2     | Achaete-scute complex homolog 2 (Drosophila) (ASCL2)                                             | 5.43                     | 0.0002               | 1.85                     | 0.01                 | 0.018                |
| TPST1     | Tyrosylprotein sulfotransferase 1 (TPST1)                                                        | 0.07                     | 0.0002               | 0.94                     | 0.87                 | 0.008                |
| COL23A1   | Collagen, type XXIII, alpha 1 (COL23A1)                                                          | 0.06                     | 0.0002               | 1.17                     | 0.63                 | 0.006                |
| SERPING1  | Serpin peptidase inhibitor, clade G (C1 inhibitor), member 1 (angioedema, hereditary) (SERPING1) | 19.5                     | 0.0002               | 1.3                      | 0.44                 | 0.01                 |

<sup>1</sup>Expression level in treated samples divided by expression level in untreated samples.

<sup>2</sup>FDR adjusted p-value for IFN-β effect within each cell type.

<sup>3</sup>FDR adjusted p-value of the two-way ANOVA for the cell-type\*IFN-β interaction.

doi:10.1371/journal.pone.0062366.t002

We next used the PRIMA module to identify enrichment of specific promoter motifs within the gene lists. DEG lists for each cell type were uploaded either as cell-specific lists, after excluding the common T cell and monocyte DEGs set, or as a complete list of DEGs, for each cell type. Neither ISRE, nor any other transcription factor binding site motif, was enriched in any of the monocytes DEG lists. In contrast, the ISRE, IFN regulatory factor (IRF)-7, and IRF-1 motifs were identified in both the T cell-specific list and in the T cell complete DEGs list. To account for a possible effect of the large discrepancy in the monocytes and T cells DEG list sizes on the analysis, we repeated PRIMA analysis on equal-sized lists of top 100 and 200 DEGs for each cell type. Whereas ISRE was enriched in the T cell lists (in 33 DEGs out of 100,  $P = 10^{-14}$ , and in 74 DEGs out of 200,  $P = 10^{-26}$ ), no known transcription factor binding site motif was enriched in the monocyte DEGs lists.

IPA ranked canonical immune-related pathways among the top pathways incorporating the DEGs detected in the IFN-β-treated monocytes and T cells (Table 5). Notably, both the IFN response and the interferon regulatory factor (IRF) canonical pathways

were ranked among the top ten pathways for T cells, but not for monocytes. The canonical IFN response pathway in the T cells (Figs. 6A and 6B) was highly enriched with DEGs when compared to that of the monocytes. One of the novel pathways that was enriched with DEGs in the IFN-β-treated monocytes was the ‘high-mobility group box-1 (HMGB1) signaling pathway’, a cytokine pathway which is known to be activated in inflammatory conditions [43] and has not yet been reported as part of the IFN-β response (Table 5). Several members of the HMGB1 pathway were down-regulated following IFN-β treatment of monocytes (Fig. 6C). RT-PCR analysis corroborated that IFN-β down-regulates in monocytes the gene expression of *HMGB1*, *IL1A*, and *IL8* (Fig. 6C). The IFN-β response for *HMGB1* and *IL1A* in the monocytes was significantly different from that of the T cells (Fig. 6D).

Using the network construction function of IPA, that is based on known molecular interactions, two significant monocyte networks were selected for further evaluation, denoted as ‘cellular migration’ and ‘cellular development and proliferation’, based on suggested IPA keywords ( $p$ -value  $10^{-29}$  for both)

**Table 3.** Differentially expressed genes in T cells but not in monocytes (21 in total).

| Gene      | DEFINITION                                                           | Monocytes                |                      | T-cells                  |                      | Cell-type*IFN-β      |
|-----------|----------------------------------------------------------------------|--------------------------|----------------------|--------------------------|----------------------|----------------------|
|           |                                                                      | Fold change <sup>1</sup> | P-value <sup>2</sup> | Fold change <sup>1</sup> | P-value <sup>2</sup> | P-value <sup>3</sup> |
| AZI2      | 5-azacytidine induced 2 (AZI2)                                       | 0.65                     | 0.139                | 2.23                     | 0.018                | 0.036                |
| C1ORF173  | Chromosome 1 open reading frame 173 (C1orf173)                       | 1.31                     | 0.207                | 2.95                     | 0.002                | 0.045                |
| CD68      | CD68 antigen (CD68)                                                  | 0.9                      | 0.792                | 4                        | 0.005                | 0.037                |
| CDA       | Eytidine deaminase (CDA)                                             | 1.998                    | 0.011                | 7.08                     | 2e-4                 | 0.016                |
| CMTM8     | CKLF-like MARVEL transmembrane domain containing 8 (CMTM8)           | 0.58                     | 0.104                | 2.11                     | 0.041                | 0.043                |
| CYP2J2    | Cytochrome P450, family 2, subfamily J, polypeptide 2 (CYP2J2)       | 1.04                     | 0.933                | 6.52                     | 0.001                | 0.022                |
| ECGF1     | Endothelial cell growth factor 1 (platelet-derived) (ECGF1)          | 0.93                     | 0.8                  | 6.96                     | 3e-4                 | 0.01                 |
| GORASP1   | Golgi reassembly stacking protein 1, 65kDa (GORASP1)                 | 0.82                     | 0.58                 | 2.77                     | 0.014                | 0.049                |
| HS.386275 | cl02h05.z1 Hembase; Erythroid Precursor Cells (LCB:c library)        | 0.99                     | 0.991                | 3.79                     | 0.007                | 0.048                |
| HS.570308 | cDNA clone IMAGp998F201004 sequence                                  | 0.9                      | 0.752                | 2.58                     | 0.011                | 0.049                |
| LPIN2     | Lipin 2 (LPIN2)                                                      | 0.68                     | 0.207                | 2.59                     | 0.013                | 0.035                |
| MKRN1     | Makorin, ring finger protein, 1 (MKRN1)                              | 0.82                     | 0.42                 | 2.09                     | 0.013                | 0.043                |
| PIM2      | Pim-2 oncogene (PIM2)                                                | 0.62                     | 0.239                | 2.71                     | 0.029                | 0.047                |
| PRKD2     | Protein kinase D2 (PRKD2)                                            | 0.83                     | 0.545                | 4.18                     | 0.002                | 0.021                |
| RASGRP3   | RAS guanyl releasing protein 3 (calcium and DAG-regulated) (RASGRP3) | 1.99                     | 0.024                | 5.14                     | 0.001                | 0.048                |
| RGS1      | Regulator of G-protein signaling 1 (RGS1)                            | 1.22                     | 0.421                | 3.32                     | 0.002                | 0.038                |
| SLFN13    | Schlafen family member 13 (SLFN13)                                   | 0.84                     | 0.654                | 4.33                     | 0.004                | 0.03                 |
| SOBP      | Sine oculis binding protein homolog (Drosophila) (SOBP)              | 0.82                     | 0.455                | 3.06                     | 0.003                | 0.023                |
| TRIM25    | Tripartite motif-containing 25 (TRIM25)                              | 1.52                     | 0.18                 | 6.85                     | 0.001                | 0.028                |
| TTC21A    | Tetratricopeptide repeat domain 21A (TTC21A)                         | 1.34                     | 0.386                | 6.88                     | 0.001                | 0.028                |
| FCHSD2    | Delta-like 1 (Drosophila) (DLL1)                                     | 0.48                     | 0.073                | 2.37                     | 0.044                | 0.04                 |

<sup>1</sup>Expression level in treated samples divided by expression level in untreated samples.

<sup>2</sup>FDR adjusted p-value for IFN-β effect within each cell type.

<sup>3</sup>FDR adjusted p-value of the two-way ANOVA for the cell-type\*IFN-β interaction.

doi:10.1371/journal.pone.0062366.t003

(Fig. 7). Matrix metalloproteinase enzyme 9 (MMP9) is the central member of figure 7A network, which also includes several other down-regulated proteases, such as cathepsin S (CTSS); cell surface proteins that are related to migration, such as CD44; and signal transduction proteins, such as NOTCH1 and MET. The second network, 'cellular development and proliferation', connects myelin basic protein (*MBP*) with three sub-networks which center on *IL1B*, retinoid X receptor alpha (*RXRA*) and microRNA124 (miR124) genes, which together span 70% of all network interactions (Fig. 7B). From these two networks three representative genes were validated by RT-PCR: Endothelin-1 isoform 2 (*EDNI*), which has functional relevance to immune cell adhesion and permeability of the blood-brain barrier [44,45], *RXRA*, a nuclear hormone receptor associated with innate immune response genes [46], and Interleukin 1 beta (*IL1B*), an important mediator of the inflammatory response produced by activated macrophages. RT-PCR analysis confirmed that these genes were differentially expressed following IFN-β treatment of TNF-α activated monocytes (Fig. 7C). The IFN-β response for *EDNI* and *IL1B* was significantly smaller in magnitude in T cells compared to monocytes, demonstrating the cell-specific nature of this response.

## Discussion

In this study we identified genes with an expression pattern that is modulated by TNF-α and IFN-β in a cell-specific manner.

Notably, we were able to identify a large number of genes that were differentially expressed in the TNF-α-activated and IFN-β-treated monocytes, but not, or to a significantly lesser extent, in T cells. The PBMC cell population, containing both monocytes and T cells, displayed a response that was intermediate between these two cell types. Many of the IFN-β response DEGs identified in the monocytes were genes with functions related to immune activity, such as cell migration, as expected for this cytokine's effects; however, most DEGs in the TNF-α-activated and IFN-β-treated monocytes did not cluster to known networks and canonical pathways. These results suggest the existence of a gap in the available knowledge databases with respect to biological interactions and functional links between transcripts in small subsets such as monocytes, and on the combined effect of two or more cytokines.

The present study employed a study design that evaluated the effect of IFN-β on the background of pre-exposure of the cells to TNF-α. This experimental setup was aimed to mimic in part the in vivo state, where the immune system cells are likely to encounter IFN-β while in the activated state, induced by inflammation or viral exposure, and characterized by elevated TNF-α, as reported for several immune diseases [3]. The combined activity of TNF-α and IFN-β has been reported to induce a synergistic interaction which affects gene expression patterns and activates multiple signaling pathways. Moreover, this interaction has strong antiviral effects, which are distinct from those induced by either cytokine alone [47]. Whereas the



**Figure 1. Volcano plots for the differential gene expression following IFN- $\beta$  treatment of monocytes and T cells.** A. monocytes; B. T cells. The X axis describes the fold change in expression levels between cells treated with IFN- $\beta$  relative to untreated cells, for each transcript in a log<sub>2</sub> scale. The Y axis shows the statistical significance expressed as  $-\log_{10}(\text{p-value})$  from the simple comparison. Transcripts with log<sub>2</sub> difference of  $\geq 1$  and with  $-\log_{10}(\text{p-value}) \geq 3.8$ , which is the equivalent of  $p \leq 0.05$  after FDR adjustment, were defined as differentially expressed genes (DEGs) and are highlighted with blue for down-regulated and red for up-regulated DEGs. doi:10.1371/journal.pone.0062366.g001

monocyte gene expression IFN- $\beta$  response appeared to be strongly modulated by prior exposure to TNF- $\alpha$  for DEGs assessed, we did not observe a similar response in the T cells or in the PBMC mixed cell population. Since the extracellular environment is complex and is likely to contain various cytokine combinations at each given time, the *in vitro* assessment of single cytokine responses, fails to replicate these combinations and will miss some of the gene expression responses that may be more relevant *in vivo*. In this study, we did not assess the time dependency of the gene expression response to TNF- $\alpha$  exposure, IFN- $\beta$  exposure, or both. As different sets of genes are likely to be induced at different exposure times [27,48], further analysis of shorter or longer terms of exposures to TNF- $\alpha$  and IFN- $\beta$  can allow in depth comprehension of endogenous and therapeutic effects of IFN- $\beta$  during inflammation.

Several *in vitro* and *ex vivo* studies have utilized the whole genome approach to study the transcriptional response to IFN- $\beta$  of PBMC and T cells [21,22,27,49–51]. Many of the genes identified in the present study as IFN- $\beta$  response genes in monocytes were not reported in these studies. Hence, our data, and results from other studies [52] demonstrate that gene expression of minor cell subsets within the PBMCs may remain undetected in studies employing the mixed cell population. The importance of studying minor cell subsets is further emphasized when considering the functional differences within subsets of leukocytes such as T cells and the Th1/Th2 or Treg sub-classifications, and M1 or M2 macrophages [53]. Hence, comprehension of the biological consequences of the action of different cytokines on distinct cell-subset activities requires further evaluation.

Our results highlight the HMGB1 signaling pathway as an IFN- $\beta$  response pathway in monocytes. HMGB1 is a ubiquitous damage-associated molecular patterns (DAMP) cytokine, which

also acts as a nucleic acid sensor by binding to immunogenic nucleic acids to initiate type I IFN signaling [54]. HMGB1, which is secreted by activated macrophages and other immune cells and released by dead cells, promotes inflammation by increasing the expression of adhesion molecules and encouraging leukocyte recruitment [55]. HMGB1 protein has been detected in the active lesions of MS [56] and elevated plasma HMGB1 levels are associated with disease activity in systemic lupus erythematosus [57] and other autoimmune diseases [58]. Because TNF- $\alpha$  increases the expression of HMGB1 [55], its down-regulation by IFN- $\beta$  was more evident in the study design we employed. Moreover SIGLEC10— one of the differentially down-regulated transcripts we observed in monocytes – and HMGB1, have been shown to interact with each other [37]. The trimolecular complex that is formed by Siglec10, HMGB1 and CD24, the latter acting as an intermediary protein, was suggested to be part of the mechanism by which the innate immune system distinguishes between danger and pathogen associated signals (i.e. DAMP and PAMP) [37]. Thus, our results, showing that the HMGB1 and SIGLEC10 transcripts are both down-regulated, suggest that IFN- $\beta$  down-regulates DAMP signaling in the innate immune system.

The pathway analyses identified a ‘cellular migration’ network (Fig. 7A) as down-regulated by IFN- $\beta$  in monocytes, in line with the known effects of IFN- $\beta$  on macrophage migration [59]. This network contains proteolytic enzymes, such as MMP9 and the cysteine protease cathepsin S, both reported as involved in leukocyte migration and its modulation by IFN- $\beta$  [60–62]. RNA and protein levels of MMP9 and cathepsin S correlate with disease activity, and decrease in MS patients following IFN- $\beta$  treatment [63,64]. The gene expression changes in monocytes may thus contribute to the overall decrease in leukocyte migration that IFN- $\beta$  is known to induce.



**Figure 2. Cluster analysis of DEGs in monocytes and in T lymphocytes.** Hierarchical clustering of the 50 most DEGs for IFN- $\beta$  treatment in monocytes and T cells as sorted by fold change [ $P(\text{IFN}\beta) \leq 0.05$  within each cell type]. Expression values (in log<sub>2</sub> scale) are color coded from low expression in blue to high expression in red. The first three columns from the left show untreated samples (marked as 'no') and the next 3 are IFN- $\beta$ -treated cells (marked as 'yes'). Genes that have a similar expression level have a common gene symbol color.  
doi:10.1371/journal.pone.0062366.g002

One of the DEGs we identified as highly up-regulated by the combined treatment of TNF- $\alpha$  and IFN- $\beta$  was CD38, a pleiotropic protein, that can promote the migration of activated leukocytes, including mature dendritic cells, to the periphery and lymph nodes [65–67]. This gene was previously reported as up-regulated in PBMCs [27]; however, here we demonstrate a specific enhancement of the IFN- $\beta$  up-regulation following TNF- $\alpha$  activation in

monocytes. Up-regulation of CD38 by IFN- $\beta$  in the pro-inflammatory environment of TNF- $\alpha$  activation is intriguing, since it is in apparent contradiction with the overall down-regulation of the 'cellular migration' network (Fig. 7A), as well as with well-established reports on down-regulation of monocyte migration by IFN- $\beta$  [59,60,68]. Nevertheless, IFN- $\beta$  therapy is known to induce, especially at the early stages of treatment of MS





**Figure 3. RT-PCR confirms differential expression between monocytes and T cells in response to IFN- $\beta$ .** Monocytes, T cells, and PBMCs from healthy donors were included in the validation of eight DEGs selected from the microarray data. Triangles represent monocytes, circles- T cells, and diamonds- PBMCs. Full and empty symbols represent cells pre-incubated or not with TNF- $\alpha$ . The horizontal bars mark the median values. The Y axis depicts the changes in expression levels in response to IFN- $\beta$  as fold change ( $2^{-\Delta\Delta CT}$ ); \*p-values<0.03 for the IFN- $\beta$  response (Wilcoxon signed rank test). For difference in fold change between monocytes, T cells, and PBMCs, \*p-value<0.05; \*\*p-value <0.01 (Mann Whitney test). The mRNA levels of *SIGLEC10* were below detection level by RT-PCR in T cells, under all conditions, therefore the p-value for comparison between monocytes and T cells was calculated under the assumption of no change in expression (fold change = 1, marked by rectangle) in T cells. doi:10.1371/journal.pone.0062366.g003

patients, also pro-inflammatory effects, expressed clinically by flu-like symptoms [17]. Since CD38 has many diverse activities, including functions of a receptor molecule, an ectoenzyme, and activator of second messenger pathways, further experiments are required to understand how IFN- $\beta$  and CD38 interact in the context of monocyte migration. Elevated levels of CD38 and CD83, which were shown to be laterally associated on the cell membrane, are present during the maturation process of the monocytes to a dendritic cell phenotype, a process known to require IFN type 1 activity [65,69]. Our results suggest that these two genes are both modulated by IFN- $\beta$  activity in monocytes in a response distinct from that observed in T cells.

The transcripts included in the 'cellular development and proliferation' network (Fig. 7B) in monocytes are involved in diverse functions such as hematopoietic proliferation (IL1B,

LAG3), lipid metabolism (ACADVL, CYP11B1), RNA transcription (RXRA) and ion transport (ABCC3). Therefore, the overall functional effect of IFN- $\beta$  in this network is unclear. MiR124, which is one of the focal nodes, was recently reported to be a novel modulator of macrophage activation [70,71]. Inhibition of miR-124 expression has been shown to lead to increased IL6 production and phosphorylation of STAT3, a downstream target of IL6R. Thus, miR-124 might be a regulator of the IL6-STAT3 inflammatory response [72]. The down-regulation of miR124 target genes we observed as part of the IFN- $\beta$  response in monocytes indicates increased activity of miR124 following IFN- $\beta$  treatment. Thus, IFN- $\beta$  may act to tilt the immune activity balance towards a decrease of the IL6-STAT3 inflammatory response. Whether indeed miR124 is down-regulated by IFN- $\beta$  activity, and the nature and cell specificity



**Figure 4. CD38 protein expression is increased in monocytes, but not in T cells, in response to IFN- $\beta$ .** Flow cytometry analysis of CD38 expression in monocytes and T cells incubated with TNF- $\alpha$  for 2 hours and then treated with IFN- $\beta$  for 40 hours. Representative results of CD38 expression with and without IFN- $\beta$  treatment in A. CD14+ monocytes and B. CD3+ T cells. N $\geq$ 3 for each cell type. doi:10.1371/journal.pone.0062366.g004



**Figure 5. Biological processes induced by IFN-β in monocytes and T cells.** The differentially expressed transcript lists were ranked by the simple comparison p-value and fold change, and then evaluated for functional enrichment by GOrilla. Visual representations of the enriched gene ontology terms produced by GOrilla are shown for A. monocytes and B. T cells. The significance of the enrichment of the biological processes is color coded as indicated. C. Output produced by SPIKE [42] showing enrichment of the 'Translation elongation' pathway in monocytes ( $p = 10^{-65}$ ). doi:10.1371/journal.pone.0062366.g005

**Table 4.** Enriched biological functions GO terms found in ranked gene lists<sup>1</sup>.

|           | GO Term    | Description                                                            | p-value | Enrichment <sup>2</sup> |
|-----------|------------|------------------------------------------------------------------------|---------|-------------------------|
| Monocytes | GO:0006952 | defense response                                                       | 3E-16   | 2.7                     |
|           | GO:0002376 | immune system process                                                  | 9E-14   | 2.15                    |
|           | GO:0009611 | response to wounding                                                   | 2E-13   | 3.24                    |
|           | GO:0006954 | inflammatory response                                                  | 1E-12   | 3.31                    |
|           | GO:0006955 | immune response                                                        | 2E-10   | 2.22                    |
|           | GO:0006414 | translation elongation                                                 | 4E-10   | 1.97                    |
| T cells   | GO:0009615 | response to virus                                                      | 3E-23   | 22.06                   |
|           | GO:0002376 | immune system process                                                  | 1E-22   | 3.34                    |
|           | GO:0006955 | immune response                                                        | 4E-19   | 3.9                     |
|           | GO:0051707 | response to other organism                                             | 9E-19   | 14.67                   |
|           | GO:0009607 | response to biotic stimulus                                            | 2E-17   | 6.57                    |
|           | GO:0051704 | multi-organism process                                                 | 4E-14   | 4.62                    |
|           | GO:0050896 | response to stimulus                                                   | 1E-12   | 1.79                    |
|           | GO:0002474 | antigen processing and presentation of peptide antigen via MHC class I | 1E-11   | 6.17                    |
|           | GO:0006952 | defense response                                                       | 2E-11   | 2.95                    |
|           | GO:0048002 | antigen processing and presentation of peptide antigen                 | 3E-10   | 5.05                    |

<sup>1</sup>The data in this table was generated by GOrilla [40]. Input lists contained all transcripts expressed in T cells and monocytes sorted by p-value and then fold change. GO terms presented have a p-value  $\leq 2E-10$ ,

<sup>2</sup>The 'enrichment' value is the ratio between the number of genes associated with a specific GO term within a target set and the total number of genes associated with that GO term.

doi:10.1371/journal.pone.0062366.t004

**Table 5.** Ten top canonical pathways enriched in monocytes and T cells datasets.

|           | Canonical pathway                                                            | p-value | Ratio <sup>1</sup> |
|-----------|------------------------------------------------------------------------------|---------|--------------------|
| Monocytes | Communication between Innate and Adaptive Immune Cells                       | 2E-5    | 0.12               |
|           | Role of Pattern Recognition Receptors in Recognition of Bacteria and Viruses | 1E-4    | 0.14               |
|           | TREM1 Signaling                                                              | 1E-4    | 0.15               |
|           | Leukocyte Extravasation Signaling                                            | 3E-4    | 0.10               |
|           | HMGB1 Signaling                                                              | 3E-4    | 0.13               |
|           | Systemic Lupus Erythematosus Signaling                                       | 3E-4    | 0.09               |
|           | IL-6 Signaling                                                               | 1E-3    | 0.12               |
|           | Chemokine Signaling                                                          | 1E-3    | 0.13               |
|           | T Cell Receptor Signaling                                                    | 1E-3    | 0.11               |
|           | IL-3 Signaling                                                               | 2E-3    | 0.13               |
| T cells   | Interferon Signaling                                                         | 1E-14   | 0.28               |
|           | Activation of IRF by Cytosolic Pattern Recognition Receptors                 | 5E-10   | 0.12               |
|           | Role of Pattern Recognition Receptors in Recognition of Bacteria and Viruses | 5E-8    | 0.09               |
|           | Retinoic acid Mediated Apoptosis Signaling                                   | 6E-5    | 0.07               |
|           | Role of RIG1-like Receptors in Antiviral Innate Immunity                     | 2E-4    | 0.08               |
|           | TREM1 Signaling                                                              | 6E-4    | 0.06               |
|           | JAK/Stat Signaling                                                           | 1E-2    | 0.04               |
|           | PDGF Signaling                                                               | 1E-2    | 0.04               |
|           | IL-15 Production                                                             | 2E-2    | 0.06               |
|           | Pyrimidine Metabolism                                                        | 2E-2    | 0.02               |

<sup>1</sup>Ratio indicates the number of DEGs participating in a pathway divided by the total number of molecules participating in that pathway. Data in this table was generated by IPA.

doi:10.1371/journal.pone.0062366.t005

**A**



**B**



**C**



**D**



**Figure 6. Canonical pathways involved in IFN- $\beta$ -mediated modulation in monocytes and T cells.** DEGs following IFN- $\beta$  treatment were mapped to canonical pathways using IPA. A. monocytes ( $p=1.4*10^{-2}$ ); B. T cells ( $p=1.4*10^{-14}$ ); C. DEGs from monocytes were enriched in the canonical HMGB1 signaling pathway ( $p=3.37*10^{-4}$ ). VSMC- vascular smooth endothelial cell. The HMGB1 pathway was not enriched in T cell DEGs. Green indicates down-regulation and red indicates up-regulation, with lower p-values represented by more intense colors. The known functions of the proteins included in the pathways are denoted in the symbol legend box. D. RT-PCR analyses for the genes *HMGB1*, *IL1A* and *IL8* from the HMGB1 signaling pathway for monocytes and T cells ( $n=6$ ). The Y axis depicts the changes in RNA expression levels in response to IFN- $\beta$  as fold change ( $2^{-\Delta\Delta CT}$ ), \* $p$ -value $<0.05$  for the IFN- $\beta$  response (Wilcoxon signed rank test). For the difference in fold change between monocytes and T cells, \*\* $p$ -value  $\leq 0.01$  (Mann Whitney test). Horizontal bars indicate median values for each column of data points. doi:10.1371/journal.pone.0062366.g006

of the interaction of the cytokine with the miR remain to be further explored. The MBP gene is another central node in this network. In the context of monocyte cellular activity, it is likely that the down-regulated MBP transcripts encode the Golli-MBP isoforms that are known to be expressed in myeloid-lineage cells, and are up-regulated in activated macrophages [73–75]. Golli-MBP has been shown to have a role in T cell activation and regulation of calcium influx [73]. However, the role of golli-MBP in monocytes, and the derivative macrophages or dendritic cells, is yet to be unveiled.

IFN- $\beta$  activates the transcription of more than 300 IFN response genes that harbor ISRE motifs in their promoters [13]. Accordingly, the enrichment of ISRE motifs in the promoters of T cells DEGs was anticipated. In monocytes, however, no enrichment of ISRE, or any other known motif was detected in the DEG promoters. This observation suggests that IFN- $\beta$  signaling in monocytes may modulate transcription using binding sites that are different from the classical ISRE and IRF motifs. The higher prevalence of down-regulated transcripts in monocytes following IFN- $\beta$  treatment is another indication for the presence of a different type of transcriptional regulation by IFN- $\beta$ .

In the present study, we have shown that extensive and diverse cellular changes occur in TNF- $\alpha$ -activated monocytes following exposure to IFN- $\beta$ . By focusing on the response of distinct cell types and by evaluating the combined effects of two cytokines with pro- and anti-inflammatory activities, we were able to identify new IFN- $\beta$  response pathways and genes, some of which were cell type-specific. The modulation of expression of some of the genes by exposure to both TNF- $\alpha$  and IFN- $\beta$ , suggests the presence of an altered functional response to IFN- $\beta$  under inflammatory conditions. Analysis of the activities of other cytokines on distinct cell types of the immune system is likely to reveal additional modulatory pathways that contribute to the overall activities of the innate and adaptive immune responses.

## Materials and Methods

### Isolation of T Cells and Monocytes and Exposure to TNF- $\alpha$ and IFN- $\beta$

Leukocytes from six healthy volunteers between the ages of 18–65 were purchased from the Israeli Central Blood Bank. T cells were isolated by negative selection using the RosetteSep Human T cell Enrichment Cocktail according to the manufacturer's protocol (StemCell Technologies Inc., Vancouver, BC, Canada). PBMC were purified using Lymphocyte Separation Medium (MP Biomedicals, LLC, Illkirch Cedex, France) as previously described [76], and monocytes were isolated by negative selection using the EasySep Human Monocyte Enrichment kit (StemCell Technologies). The purity of the cell subsets as determined by flow cytometry (see below) was at least 90%. T cells were grown in RPMI 1640 medium containing 10% fetal calf serum, 2mM L-glutamine and 100 U/ml penicillin and streptomycin (Biological Industries, Bet-HaEmek, Israel). The monocyte medium contained, in addition to all the T cell medium components, 1%

MEM non-essential amino acids solution, and 1mM sodium pyruvate (Biological Industries, Bet-HaEmek, Israel). Cells were suspended at  $2*10^6$  cells/ml, incubated with recombinant human TNF- $\alpha$  (10ng/ml, R&D Systems, Minneapolis, MN, US) for 2 hours, and then exposed to recombinant human IFN- $\beta$ 1a (100 U/ml, PBL InterferonSource, Piscataway, NJ, US) for 16 hours in 5% CO $_2$  at 37°. TNF- $\alpha$  exposure time was determined based on published time courses of total gene expression profiles [27,48]. The 16 hours IFN- $\beta$  exposure time was selected following time course assessment of the gene expression for known IFN- $\beta$  response genes (described below), and evaluation of 4, 8, and 16 hours (data not shown). IFN- $\beta$  concentrations were selected for compatibility with published serum levels of MS patients under IFN- $\beta$ 1a therapy [77]. Following treatments, cell pellets were suspended in the lysis buffer included in the HighPure RNA Isolation kit (see below) and frozen for subsequent RNA purification.

### Flow Cytometry Analysis

The purity of separated monocytes and T cells preparations was determined with anti CD3-FITC and anti CD14-PE antibodies. Staining procedures were according to the manufacturer's protocol (IQP-519F and IQP-143R respectively, IQ products, Groningen, The Netherlands), and antibody detection was performed on a FACS-CaliburR flow cytometer (Becton-Dickinson, Mountain View, CA, USA). CD38 expression experiments assessed anti-CD38-PerCP (Biolegend, San Diego, CA, US), anti CD3-FITC and anti CD14-APC (eBioScience, San Diego, CA) binding to monocyte cell surface on a CyAN ADP cytometer (Beckman Coulter, Fullertone, CA, US). Data was analyzed using the FlowJo software (Tree Star, Ashland, OR).

### RNA, cDNA Preparation and RT-PCR

RNA (HighPure RNA isolation kit, Roche Applied Science, Mannheim, Germany) and cDNA (M-MLV reverse transcriptase and random hexamer primers, Promega, Fitchburg, WI, US) were prepared according to the manufacturers' instructions. RNA quantity was measured using NanoDrop (Nanodrop Technologies, LLC, Wilmington, DE, US), and the quality was determined by the Experion system (BioRad, Hercules, CA, US). Four known IFN- $\beta$  response genes were used as positive controls for IFN- $\beta$  response in RT-PCR reactions, using the following primers from Applied Biosystems (Foster City, CA, US): *IFIT1* (Hs00356631\_g1), *IFIT3* (Hs00155468\_m1), *STAT1* (Hs00234829\_m1) and *MX1* (Hs00182073\_m1), as well as 4 TNF response markers, *INDO*, *ICAM1*, *IL1B* and *TRAF1* (primers sequences in Table 6). *UBE2D2* was used as a reference gene using either Taqman (HS00366152\_M1) or SYBR-green RT-PCR assays (Table 6). Specific gene primers were designed by Universal Probe Library design center (Roche Applied Science), qPrimerDepot (<http://primerdepot.nci.nih.gov>), RTPrimerDB (<http://www.rtpimerdb.org>), Gene Runner (<http://www.generunner.net>) or BioWWW.net (<http://biowww.net>), synthesized by Sigma-Aldrich (St. Louis, MO) or IDT Integrated DNA

A



B



C



**Figure 7. Networks regulated by IFN-β in monocytes include functions of cell migration, and cellular development and proliferation.** Genes were mapped to IPA-generated networks based on known gene interactions, and the networks were ranked according to the number of biological connections between the transcripts by IPA. Shown in this figure are two high-score networks (IPA score = 29 for both), which we named based on the IPA-suggested keywords: A. Cell migration; B. Cellular development and proliferation. Green nodes indicate down-regulation and red indicate up-regulation. White nodes indicate molecules that were incorporated into the network through relationships with other molecules but are not DEGs. Dotted lines represent indirect interaction, solid lines represent direct interaction. Protein symbols are explained in the symbol legend in figure 6C. C. RT-PCR analyses for the genes *EDN1* from Cell migration network, and *IL1B* and *RXRA* from cellular development and proliferation network for monocytes and T cells (n = 6). The Y axis depicts the changes in RNA expression levels in response to IFN-β as fold change (2<sup>-ΔΔCT</sup>); the fold change following the IFN-β treatment was significant for all genes in both monocytes and T cells (P-values < 0.03, Wilcoxon signed rank test). \*p-value < 0.01 by Mann Whitney test for comparison of fold change between monocytes and T cells. Horizontal bars indicate median values for each column of data points. doi:10.1371/journal.pone.0062366.g007

**Table 6.** Primer sequences used in this study.

| Gene symbol | Entrez Gene ID | Forward                | Reverse                     | Source           |
|-------------|----------------|------------------------|-----------------------------|------------------|
| INDO        | 3620           | GATGAAGAAGTGGGCTTTGC   | TCAACTCTTTCTCGAAGCTGG       | qPrimerDepot     |
| ICAM1       | 3383           | TGATGGGCAGTCAACAGCTA   | AGGGTAAGGTTCTTGCCAC         | qPrimerDepot     |
| IL1B        | 3553           | GAAGCTGATGGCCCTAAACA   | AAGCCCTTGCTGTAGTGGTG        | qPrimerDepot     |
| TRAF1       | 7185           | CTATAAGCCCAGGAAGCCG    | CTCCCTTGAAGGAGCAGC          | qPrimerDepot     |
| ASCL2       | 430            | TCTAAGGGCACAGAAATCCAT  | ACAAAAATAGGTCTCCGTTTGC      | UPL <sup>1</sup> |
| CD38        | 952            | CAGACCGTACCTTGCAACA    | AGGTCATCAGCAAGGTAGCC        | UPL              |
| CD83        | 9308           | CTCCAGCTTCTGCTCCTGA    | GCAAGCCACCTTACCTC           | UPL              |
| LTA4H       | 4048           | TCACGGTCCAGTCTCAGGA    | TTTTCTATTGTAAGGTCCTTTGTATCC | UPL              |
| RIPK2       | 8767           | TCCACTCTCAACTGCAGGAA   | GGATCCACTGCTGGGCTA          | UPL              |
| SIGLEC10    | 89790          | TCCTATGCGGAGATGCTACTG  | CAGAACTCTCCATCCATAGCC       | UPL              |
| TBXAS1      | 6916           | CACITTTCTTTGCCACCTACCT | TTCTCGAGGCTGCAGAA           | UPL              |
| TRIM25      | 7706           | TCCGAACCAACATCTCTCAAG  | GCGGTGTTGTAGTCCAGGAT        | UPL              |
| UBE2D2      | 7322           | ATTGAATGATCTGGCAGGGG   | GTCATTTGGCCCCATTATTG        | RTPrimerDB       |
| IL1A        | 3552           | ACTGCCCAAGATGAAGACCA   | CCGTGAGTTTCCAGAAGAA         | qPrimerDepot     |
| HMGB1       | 3146           | CCCAAAAGCGTGAGCTTAAAT  | AGTCTCGTTTCTGAGCAGTCC       | Yang et al. [80] |
| IL8         | 3576           | GCCAAGGAGTGCTAAAGAAC   | TTCTCCACAACCCTCTGCAC        | Gene Runner      |
| EDN1        | 1906           | TATCAGCAGTTAGTGAGAGG   | CGAAGGTCTGTACCAATGTGC       | Biowww.net       |
| RXRA        | 6256           | TTCGCTAAGCTCTTGCTC     | ATAAGGAAGGTGTCATGGG         | Biowww.net       |

<sup>1</sup>UPL – Universal Probe Library.  
doi:10.1371/journal.pone.0062366.t006

Technologies (Jerusalem, Israel), and evaluated using Absolute blue qPCR SYBR green ROX reaction mix (Abgene, Thermo Fisher Scientific, Rockford, IL, US) in RT-PCR assays. Reactions were performed in duplicates using the ABI 7300 sequence detection system, and relative quantification was calculated by the comparative C<sub>T</sub> method described elsewhere, and is shown as fold change of expression ( $2^{-\Delta\Delta C_T}$ ) [78].

### Gene Expression Analysis

All RNA samples for gene expression analysis had a RNA Integrity Number (RIN) value above 7.5 using the Experion system. Gene expression microarray analysis was performed on monocytes and T cells from three donors, using the Illumina Human-6 v3 BeadChips, (Illumina, San Diego, CA). The raw data was deposited in a MIAME compliant database (GEO, accession number GSE34627). Each chip contained ~47,000 probes derived from the National Center for Biotechnology Information Reference Sequence (NCBI) RefSeq Release 37 and other sources. The microarray experimental procedures (from cDNA synthesis to raw data normalization) were performed by the Genomics Core Facility at the Rappaport Faculty of Medicine & Research Institute in the Technion according to the manufacturer's instructions. The intensity of the bead fluorescence was detected by the Illumina BeadArray Reader, and the raw data analyzed using BeadStudio v3.4 software.

### Statistical Analysis

The raw gene expression data was exported from BeadStudio and imported into JMP Genomics V5 software (SAS Institute Inc, Cary, NC). Quality control and analysis in JMP Genomics was done on log<sub>2</sub> transformed data, after filtering for non-expressed genes (detection p-value < 0.01), and for low variance transcripts across samples (variance < 5%). Using batch normalization, the gene expression data set was corrected for difference of variation

between chips, but no additional normalization was required. The data was analyzed using 2-way ANOVA for cell type (T cells or monocytes) and IFN-β exposure (yes or no), as well as the interaction between these two factors (cell-type\*IFN-β). DEGs were defined as transcripts that had a fold change of expression ≥ 2 and a corrected p-value ≤ 0.05 using the False Discovery Rate (FDR) [23]. In addition, each simple paired combination, i.e. either monocytes or T cells, with and without IFN-β was also compared using t-test, and DEGs were defined as previously described. A hierarchical clustering of the 50 top DEGs within each cell type was performed using JMP Genomics. Volcano plots were generated by the R Project for Statistical Computing version 2.12.1 [79]. The Mann Whitney test was used to compare RNA levels between cell subsets. Significance of fold change following IFN-β exposure for RNA levels was tested by the Wilcoxon signed rank test.

### Functional Pathways Analyses

Evaluation of enriched biological functions was performed using GOrrilla (<http://cbl-gorilla.cs.technion.ac.il>) [40]. Data were imported into GOrrilla as transcript lists ranked by adjusted p-values, as obtained in the simple paired comparisons and by the fold change for each cell type. The gene lists were analyzed using the SPIKE program, for detection of enriched cell signaling pathways, and PRIMA for identification of enrichment of transcription factor binding sites in the promoters of the DEG list, as implemented in the Expander v5 analysis program [41,42].

The Ingenuity Pathway Analysis (IPA 8.0, Ingenuity® Systems, Redwood City, CA, US) was used to identify statistically significant functional categories in the data set. Simple paired comparisons lists were imported into IPA and filtered using p-value = 0.05 and fold change = 1.3 as a cutoff. Up- and down-regulated genes were both included in the core analysis. DEGs were mapped to canonical pathways and tested by the Fisher's Exact Test p-value

which represents the probability to find the same number of DEGs in a pathway of the same size composed of randomly selected genes. Genes were mapped into IPA-generated networks based on their order of connectivity. P-values were calculated for each network using the Fisher's exact test. Networks with p-value  $\leq 10^{-25}$  were considered to be significantly enriched.

## Supporting Information

**Figure S1** Workflow of the experimental procedures and subsequent gene array analyses for differential expression. (TIF)

## References

- Skapenko A, Schulze-Koops H (2007) Analysis of Th1/Th2 T-cell subsets. *Methods Mol Med* 136: 87–96.
- Iwamoto S, Iwai S, Tsujiyama K, Kurahashi C, Takeshita K, et al. (2007) TNF-alpha drives human CD14+ monocytes to differentiate into CD70+ dendritic cells evoking Th1 and Th17 responses. *J Immunol* 179: 1449–1457.
- Cantaert T, Bacten D, Tak PP, van Baarsen LG (2010) Type I IFN and TNFalpha cross-regulation in immune-mediated inflammatory disease: basic concepts and clinical relevance. *Arthritis Res Ther* 12: 219.
- Chen X, Oppenheim JJ (2011) Contrasting effects of TNF and anti-TNF on the activation of effector T cells and regulatory T cells in autoimmunity. *FEBS Lett* 585: 3611–3618.
- Croft M (2009) The role of TNF superfamily members in T-cell function and diseases. *Nat Rev Immunol* 9: 271–285.
- Geissmann F, Manz MG, Jung S, Sieweke MH, Merad M, et al. (2010) Development of monocytes, macrophages, and dendritic cells. *Science* 327: 656–661.
- Medzhitov R (2007) Recognition of microorganisms and activation of the immune response. *Nature* 449: 819–826.
- Park SK, Cho MK, Park HK, Lee KH, Lee SJ, et al. (2009) Macrophage migration inhibitory factor homologs of anisakis simplex suppress Th2 response in allergic airway inflammation model via CD4+CD25+Foxp3+ T cell recruitment. *J Immunol* 182: 6907–6914.
- Kouwenhoven M, Teleshova N, Ozenci V, Press R, Link H (2001) Monocytes in multiple sclerosis: phenotype and cytokine profile. *J Neuroimmunol* 112: 197–205.
- Li Y, Lee P, Reeves W (2010) Monocyte and Macrophage Abnormalities in Systemic Lupus Erythematosus. *Arch Immunol Ther Exp* 58: 355–364.
- Anguille S, Lion E, Smits E, Berneman ZN, van Tendeloo VF (2011) Dendritic cell vaccine therapy for acute myeloid leukemia: questions and answers. *Hum Vaccin* 7: 579–584.
- Eder C (2010) Ion channels in monocytes and microglia/brain macrophages: promising therapeutic targets for neurological diseases. *J Neuroimmunol* 224: 51–55.
- Platanias LC (2005) Mechanisms of type-I- and type-II-interferon-mediated signalling. *Nat Rev Immunol* 5: 375–386.
- Li Y, Sassano A, Majchrzak B, Deb DK, Levy DE, et al. (2004) Role of p38{alpha} Map Kinase in Type I Interferon Signaling. *J Biol Chem* 279: 970–979.
- Platanias LC (2003) The p38 mitogen-activated protein kinase pathway and its role in interferon signaling. *Pharmacol Ther* 98: 129–142.
- Meyer O (2009) Interferons and autoimmune disorders. *Joint Bone Spine* 76: 464–473.
- Farrell RA, Giovannoni G (2010) Current and future role of interferon beta in the therapy of multiple sclerosis. *J Interferon Cytokine Res* 30: 715–726.
- Portaccio E, Zipoli V, Siracusa G, Sorbi S, Amato MP (2006) Response to interferon-beta therapy in relapsing-remitting multiple sclerosis: a comparison of different clinical criteria. *Mult Scler* 12: 281–286.
- Rio J, Nos C, Tintore M, Tellez N, Galan I, et al. (2006) Defining the response to interferon-beta in relapsing-remitting multiple sclerosis patients. *Ann Neurol* 59: 344–352.
- Goertsches RH, Hecker M, Koczan D, Serrano-Fernandez P, Moeller S, et al. (2010) Long-term genome-wide blood RNA expression profiles yield novel molecular response candidates for IFN-beta-1b treatment in relapsing remitting MS. *Pharmacogenomics* 11: 147–161.
- van Baarsen LGM, Vosslander S, Tijssen M, Baggen JMC, van der Voort LF, et al. (2008) Pharmacogenomics of Interferon-beta Therapy in Multiple Sclerosis: Baseline IFN Signature Determines Pharmacological Differences between Patients. *PLoS ONE* 3: e1927.
- Weinstock-Guttman B, Bhaskar K, Badgett D, Tamano-Blanco M, Minhas M, et al. (2008) Genomic effects of once-weekly, intramuscular interferon-beta1a treatment after the first dose and on chronic dosing: Relationships to 5-year clinical outcomes in multiple sclerosis patients. *J Neuroimmunol* 205: 113–125.
- Namdar A, Nikbin B, Ghabace M, Bayati A, Izad M (2010) Effect of IFN-beta therapy on the frequency and function of CD4(+)/CD25(+) regulatory T cells and Foxp3 gene expression in relapsing-remitting multiple sclerosis (RRMS): a preliminary study. *J Neuroimmunol* 218: 120–124.
- Oliver-Martos B, Orpez T, Pinto-Medel MJ, Mayorga C, Garcia-Leon JA, et al. (2011) Gene expression in IFNs signalling pathway differs between monocytes, CD4 and CD8 T cells from MS patients. *J Neuroimmunol* 230: 153–159.
- Comabella M, Vandenbroeck K (2011) Pharmacogenomics and multiple sclerosis: moving toward individualized medicine. *Curr Neurol Neurosci Rep* 11: 484–491.
- van Boxel-Dezaire AH, Zula JA, Xu Y, Ransohoff RM, Jacobberger JW, et al. (2010) Major Differences in the Responses of Primary Human Leukocyte Subsets to IFN-beta. *J Immunol* 185: 5888–5899.
- Waddell SJ, Popper SJ, Rubins KH, Griffiths MJ, Brown PO, et al. (2010) Dissecting interferon-induced transcriptional programs in human peripheral blood cells. *PLoS ONE* 5: e9753.
- Spuler S, Yousry T, Scheller A, Voltz R, Holler E, et al. (1996) Multiple sclerosis: prospective analysis of TNF-alpha and 55 kDa TNF receptor in CSF and serum in correlation with clinical and MRI activity. *J Neuroimmunol* 66: 57–64.
- Kim SY, Solomon DH (2010) Tumor necrosis factor blockade and the risk of viral infection. *Nat Rev Rheumatol* 6: 165–174.
- Ibrahim S, Keating M, Do K-A, O'Brien S, Huh YO, et al. (2001) CD38 expression as an important prognostic factor in B-cell chronic lymphocytic leukemia. *Blood* 98: 181–186.
- Prechtel AT, Turza NM, Theodoridis AA, Steinkasserer A (2007) CD83 knockdown in monocyte-derived dendritic cells by small interfering RNA leads to a diminished T cell stimulation. *J Immunol* 178: 5454–5464.
- Breloer M, Fleischer B (2008) CD83 regulates lymphocyte maturation, activation and homeostasis. *Trends Immunol* 29: 186–194.
- van der Flier LG, van Gijn ME, Hatzis P, Kujala P, Haegebarth A, et al. (2009) Transcription Factor Achaete Scute-Like 2 Controls Interstitial Stem Cell Fate. *Cell* 136: 903–912.
- Snelgrove RJ, Jackson PL, Hardison MT, Noerager BD, Kinloch A, et al. (2010) A critical role for LTA4H in limiting chronic pulmonary neutrophilic inflammation. *Science* 330: 90–94.
- Morchang A, Yasamut U, Netsawang J, Noisakran S, Wongwiwat W, et al. (2011) Cell death gene expression profile: Role of RIPK2 in dengue virus-mediated apoptosis. *Virus Res* 156: 25–34.
- Park JH, Kim YG, McDonald C, Kanneganti TD, Hasegawa M, et al. (2007) RICK/RIP2 mediates innate immune responses induced through Nod1 and Nod2 but not TLRs. *J Immunol* 178: 2380–2386.
- Chen GY, Tang J, Zheng P, Liu Y (2009) CD24 and Siglec-10 selectively repress tissue damage-induced immune responses. *Science* 323: 1722–1725.
- Lee JJ, Yu JY, Lee JH, Zhang WY, Kim TJ, et al. (2010) The protective effects of paclitaxel on platelet aggregation through the inhibition of thromboxane A2 synthase. *Arch Pharm Res* 33: 387–394.
- Zou W, Zhang DE (2006) The interferon-inducible ubiquitin-protein isopeptide ligase (E3) EFP also functions as an ISG15 E3 ligase. *J Biol Chem* 281: 3989–3994.
- Eden E, Navon R, Steinfeld I, Lipson D, Yakhini Z (2009) GOrilla: a tool for discovery and visualization of enriched GO terms in ranked gene lists. *BMC Bioinformatics* 10: 48.
- Ulitsky I, Maron-Katz A, Shavit S, Sagir D, Linhart C, et al. (2010) Expander: from expression microarrays to networks and functions. *Nat Protoc* 5: 303–322.
- Paz A, Brownstein Z, Ber Y, Bialik S, David E, et al. (2011) SPIKE: a database of highly curated human signaling pathways. *Nucleic Acids Res* 39: D793–799.
- Lotze MT, Tracey KJ (2005) High-mobility group box 1 protein (HMGB1): nuclear weapon in the immune arsenal. *Nat Rev Immunol* 5: 331–342.
- Narushima I, Kita T, Kubo K, Yonetani Y, Momochi C, et al. (2003) Highly enhanced permeability of blood-brain barrier induced by repeated administration of endothelin-1 in dogs and rats. *Pharmacol Toxicol* 92: 21–26.

## Acknowledgments

The authors would like to thank Zohar Yakhini (Computer Sciences, Technion and Agilent Technologies) and Michael Shmoish (The Lokey Interdisciplinary Center, Technion) for helpful discussions and comments, Liat Linde (The Genomics Core Facility at the Rappaport Faculty of Medicine, Technion) for processing the RNA samples on the BeadChips, and Dr. Arieh Bomzon for his editorial assistance in the preparation of this manuscript.

## Author Contributions

Conceived and designed the experiments: NH NA TP RP AM. Performed the experiments: NH IM ESR EG. Analyzed the data: NH NA TP ESR. Contributed reagents/materials/analysis tools: RP AM. Wrote the paper: NH NA TP ESR AM.



45. Buckanovich RJ, Facciabene A, Kim S, Benencia F, Sasaroli D, et al. (2008) Endothelin B receptor mediates the endothelial barrier to T cell homing to tumors and disables immune therapy. *Nat Med* 14: 28–36.
46. Ovsyannikova IG, Dhiman N, Haralambieva IH, Vierkant RA, O'Byrne MM, et al. (2010) Rubella vaccine-induced cellular immunity: evidence of associations with polymorphisms in the Toll-like, vitamin A and D receptors, and innate immune response genes. *Hum Genet* 127: 207–221.
47. Bartee E, Mohamed MR, Lopez MC, Baker HV, McFadden G (2009) The addition of tumor necrosis factor plus beta interferon induces a novel synergistic antiviral state against poxviruses in primary human fibroblasts. *J Virol* 83: 498–511.
48. Hao S, Baltimore D (2009) The stability of mRNA influences the temporal order of the induction of genes encoding inflammatory molecules. *Nat Immunol* 10: 281–288.
49. Hecker M, Goertsches RH, Fatum C, Koczan D, Thiesen HJ, et al. (2012) Network analysis of transcriptional regulation in response to intramuscular interferon-beta-1a multiple sclerosis treatment. *Pharmacogenomics J* 12: 134–146.
50. Pappas DJ, Coppola G, Gabatto PA, Goa F, Geschwind DH, et al. (2009) Longitudinal system-based analysis of transcriptional responses to type I interferons. *Physiol Genomics*.
51. Satoh J, Nanri Y, Tabunoki H, Yamamura T (2006) Microarray analysis identifies a set of CXCR3 and CCR2 ligand chemokines as early IFN $\beta$ -responsive genes in peripheral blood lymphocytes in vitro: an implication for IFN $\beta$ -related adverse effects in multiple sclerosis. *BMC Neurol* 6: 18.
52. Fairfax BP, Makino S, Radhakrishnan J, Plant K, Leslie S, et al. (2012) Genetics of gene expression in primary immune cells identifies cell type-specific master regulators and roles of HLA alleles. *Nat Genet* 44: 502–510.
53. Martinez FO, Gordon S, Locati M, Mantovani A (2006) Transcriptional Profiling of the Human Monocyte-to-Macrophage Differentiation and Polarization: New Molecules and Patterns of Gene Expression. *The Journal of Immunology* 177: 7303–7311.
54. Yanai H, Ban T, Wang Z, Choi MK, Kawamura T, et al. (2009) HMGB proteins function as universal sentinels for nucleic-acid-mediated innate immune responses. *Nature* 462: 99–103.
55. Gougeon ML, Melki MT, Saidi H (2012) HMGB1, an alarmin promoting HIV dissemination and latency in dendritic cells. *Cell Death Differ* 19: 96–106.
56. Andersson A, Covacu R, Sunnemark D, Danilov AI, Dal Bianco A, et al. (2008) Pivotal advance: HMGB1 expression in active lesions of human and experimental multiple sclerosis. *J Leukoc Biol* 84: 1248–1255.
57. Ma CY, Jiao YL, Zhang J, Yang QR, Zhang ZF, et al. (2012) Elevated plasma level of HMGB1 is associated with disease activity and combined alterations with IFN-alpha and TNF-alpha in systemic lupus erythematosus. *Rheumatol Int* 32: 395–402.
58. Sims GP, Rowe DC, Rietdijk ST, Herbst R, Coyle AJ (2010) HMGB1 and RAGE in inflammation and cancer. *Annu Rev Immunol* 28: 367–388.
59. Floris S, Ruuls SR, Wierinckx A, van der Pol SM, Dopp E, et al. (2002) Interferon-beta directly influences monocyte infiltration into the central nervous system. *J Neuroimmunol* 127: 69–79.
60. Yen JH, Kong W, Ganca D (2010) IFN-beta inhibits dendritic cell migration through STAT-1-mediated transcriptional suppression of CCR7 and matrix metalloproteinase 9. *J Immunol* 184: 3478–3486.
61. Dhib-Jalbut S, Marks S (2010) Interferon-beta mechanisms of action in multiple sclerosis. *Neurology* 74 Suppl 1: S17–24.
62. Staun-Ram E, Miller A (2011) Cathepsins (S and B) and their inhibitor Cystatin C in immune cells: modulation by interferon-beta and role played in cell migration. *J Neuroimmunol* 232: 200–206.
63. Haves-Zburuf D, Paperma T, Gour-Lavie A, Mandel I, Glass-Marmor L, et al. (2011) Cathepsins and their endogenous inhibitors cystatins: expression and modulation in multiple sclerosis. *J Cell Mol Med* 15: 2421–2429.
64. Galboiz Y, Shapiro S, Lahat N, Rawashdeh H, Miller A (2001) Matrix metalloproteinases and their tissue inhibitors as markers of disease subtype and response to interferon- $\beta$  therapy in relapsing and secondary-progressive multiple sclerosis patients. *Annals of Neurology* 50: 443–451.
65. Frasca L, Fedele G, Deaglio S, Capuano C, Palazzo R, et al. (2006) CD38 orchestrates migration, survival, and Th1 immune response of human mature dendritic cells. *Blood* 107: 2392–2399.
66. Partida-Sanchez S, Goodrich S, Kusser K, Oppenheimer N, Randall TD, et al. (2004) Regulation of dendritic cell trafficking by the ADP-ribosyl cyclase CD38: impact on the development of humoral immunity. *Immunity* 20: 279–291.
67. Malavasi F, Deaglio S, Funaro A, Ferrero E, Horenstein AL, et al. (2008) Evolution and function of the ADP ribosyl cyclase/CD38 gene family in physiology and pathology. *Physiol Rev* 88: 841–886.
68. Seguin R, Moditi Z, Rotondo R, Biernacki K, Wosik K, et al. (2003) Human brain endothelial cells supply support for monocyte immunoregulatory functions. *J Neuroimmunol* 135: 96–106.
69. Longhi MS, Mitry RR, Samyn M, Scalori A, Hussain MJ, et al. (2009) Vigorous activation of monocytes in juvenile autoimmune liver disease escapes the control of regulatory T-cells. *Hepatology* 50: 130–142.
70. Ponomarev ED, Veremyko T, Barteneva N, Krichevsky AM, Weiner HL (2011) MicroRNA-124 promotes microglia quiescence and suppresses EAE by deactivating macrophages via the C/EBP-alpha-PU.1 pathway. *Nat Med* 17: 64–70.
71. Conrad AT, Dittel BN (2011) Taming of macrophage and microglial cell activation by microRNA-124. *Cell Res* 21: 213–216.
72. Hatzia Apostolou M, Polytaichou C, Aggelidou E, Drakaki A, Poultsides GA, et al. (2011) An HNF4alpha-miRNA inflammatory feedback circuit regulates hepatocellular oncogenesis. *Cell* 147: 1233–1247.
73. Feng JM (2007) Minireview: expression and function of golgi protein in immune system. *Neurochem Res* 32: 273–278.
74. Marty MC, Alliot F, Rutin J, Fritz R, Trisler D, et al. (2002) The myelin basic protein gene is expressed in differentiated blood cell lineages and in hemopoietic progenitors. *Proc Natl Acad Sci U S A* 99: 8856–8861.
75. Shiryayev SA, Remacle AG, Savinov AY, Chernov AV, Cieplak P, et al. (2009) Inflammatory proprotein convertase-matrix metalloproteinase proteolytic pathway in antigen-presenting cells as a step to autoimmune multiple sclerosis. *J Biol Chem* 284: 30615–30626.
76. Repnik U, Knezevic M, Jeras M (2003) Simple and cost-effective isolation of monocytes from buffy coats. *J Immunol Methods* 278: 283–292.
77. Khan OA, Dhib-Jalbut SS (1998) Serum interferon beta-1a (Avonex) levels following intramuscular injection in relapsing-remitting MS patients. *Neurology* 51: 738–742.
78. Livak KJ, Schmittgen TD (2001) Analysis of relative gene expression data using real-time quantitative PCR and the 2<sup>-Delta Delta C(T)</sup> Method. *Methods* 25: 402–408.
79. Gentleman RC, Carey VJ, Bates DM, Bolstad B, Dettling M, et al. (2004) Bioconductor: open software development for computational biology and bioinformatics. *Genome Biol* 5: R80.
80. Yang H, Rivera Z, Jube S, Nasu M, Bertino P, et al. (2010) Programmed necrosis induced by asbestos in human mesothelial cells causes high-mobility group box 1 protein release and resultant inflammation. *Proc Natl Acad Sci U S A* 107: 12611–12616.
